# Supplementary material
Source: publisher figshare collection journal article supplement (https://brill.figshare.com/ndownloader/files/28301073)

## Annex: Schematic overview of the PhD study

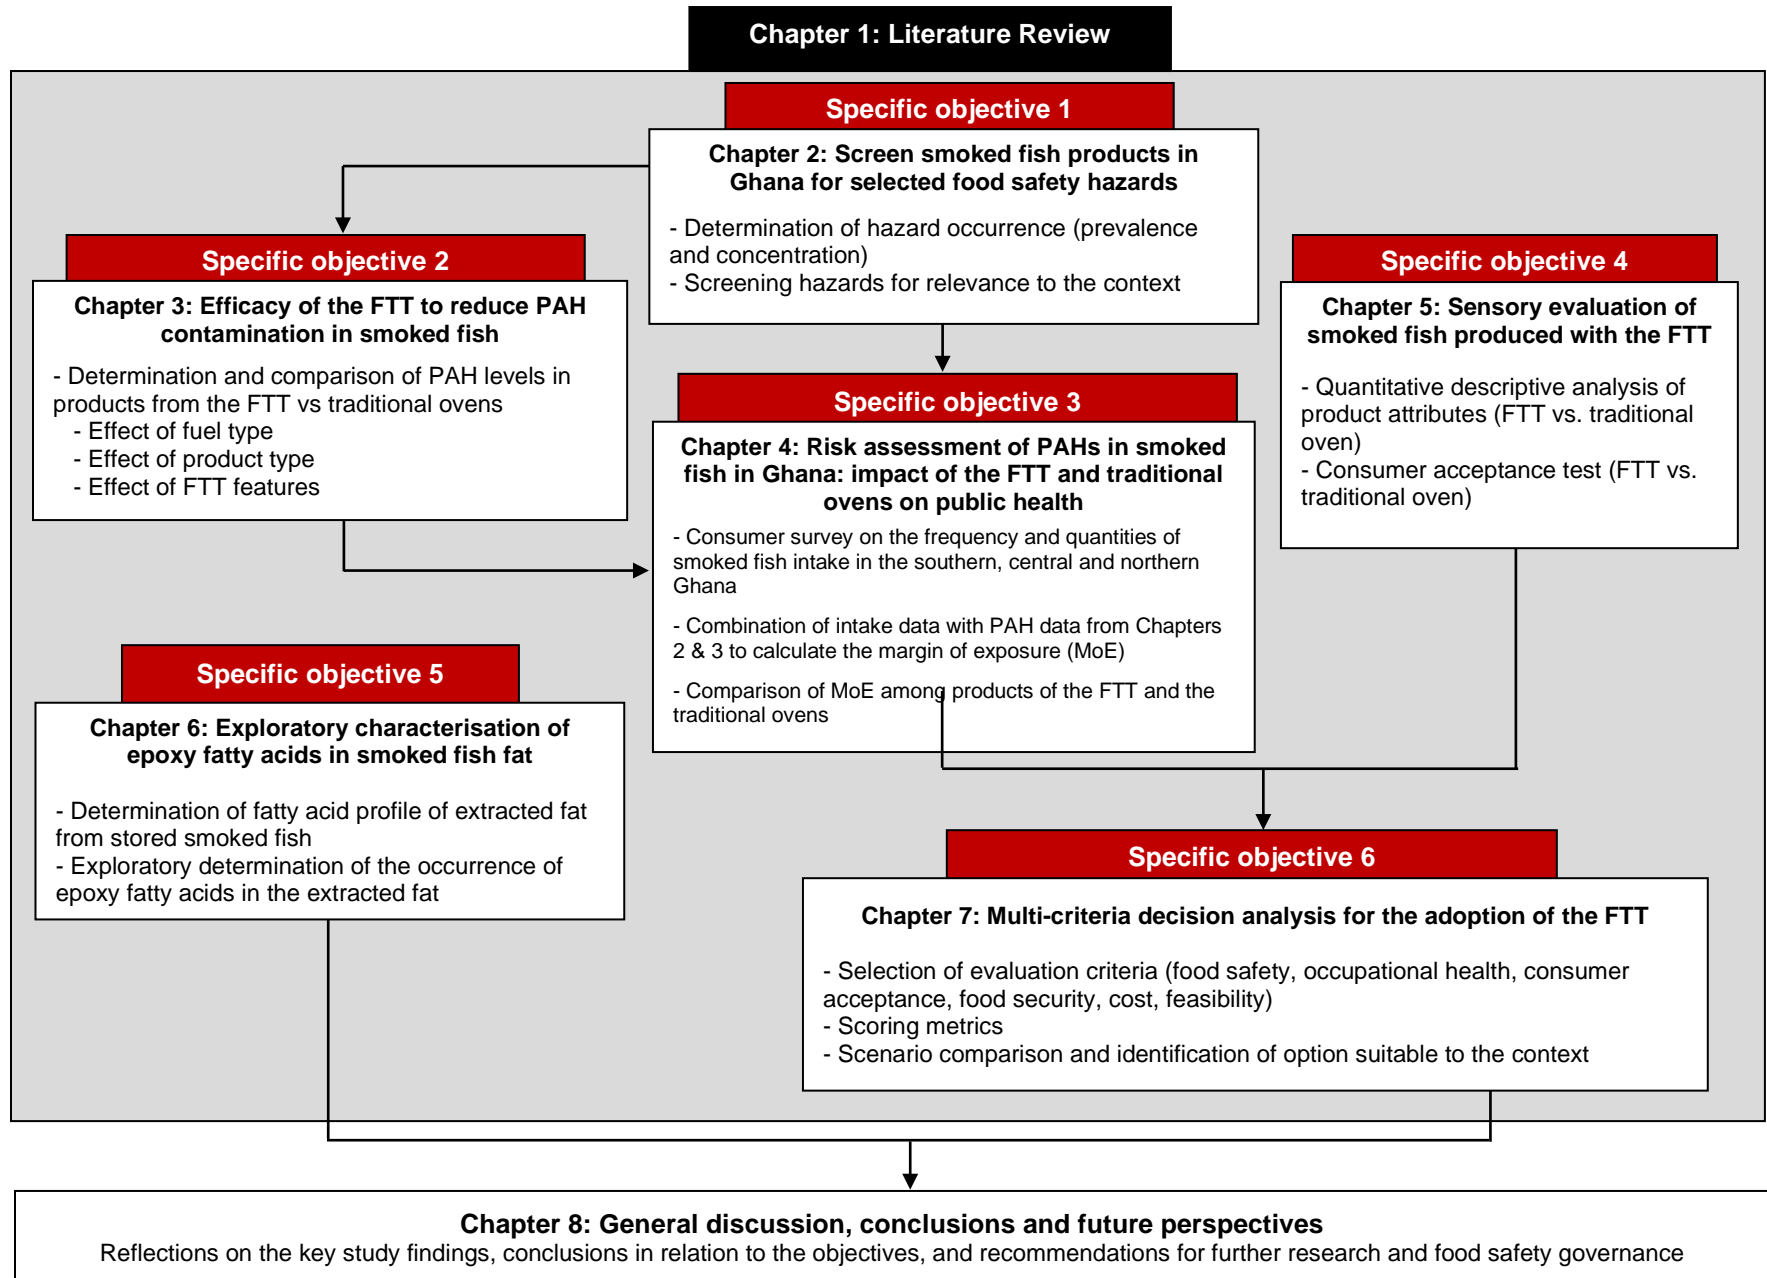

Supplement: Supplementary file 1 [file 28301073]
